# Supplementary material for: The Effects of Mobile-App-Based Low-Carbohydrate Dietary Guidance on Postprandial Hyperglycemia in Adults with Prediabetes
Source: PubMed Central journal article supplement — Diabetes Ther. 2020 Sep 1;11(10):2341–55. doi: 10.1007/s13300-020-00906-x (PMC7509028; doi:10.1007/s13300-020-00906-x), 2020-09-01
Supplement: 13300_2020_906_MOESM1_ESM.pdf [file 13300_2020_906_MOESM1_ESM.pdf]

JABHQ-C

|                               |     |     |     |
|-------------------------------|-----|-----|-----|
| 实施日期:<br>2019 年      月      日 | 姓名: | 性别: | 年龄: |
|-------------------------------|-----|-----|-----|

|    | 问题                                        | 回答 |     |      |    |
|----|-------------------------------------------|----|-----|------|----|
|    |                                           | 是  | 接近是 | 接近不是 | 不是 |
| 1  | 每周 3 次或以上, 经常吃拉面、点心、汉堡等快餐                 |    |     |      |    |
| 2  | 每周 3 次或以上, 经常吃便当及熟食                       |    |     |      |    |
| 3  | 每周 3 次或以上, 和套餐(有凉菜、配菜、汤等)相比, 经常单独吃面或者盖浇饭等 |    |     |      |    |
| 4  | 每餐都吃饭、面、面包、馒头(如果饭的话每次吃一碗或以上)              |    |     |      |    |
| 5  | 比较挑食(有食物过敏)                               |    |     |      |    |
| 6  | 1 天 1 次或以上, 经常吃肉、鱼、蛋、豆制品                  |    |     |      |    |
| 7  | 1 天 1 次或以上, 经常吃除去山芋类、根菜类以外的蔬菜、蘑菇、海藻类      |    |     |      |    |
| 8  | 1 天 1 次或以上, 经常吃油炸或者油较多的食物                 |    |     |      |    |
| 9  | 更多的时候不是根据食物内容, 而是根据是否便宜、方便和喜好来决定吃什么       |    |     |      |    |
| 10 | 1 天 1 次或以上, 经常吃山芋类、南瓜、莲藕等根菜类食物            |    |     |      |    |
| 11 | 和其他人相比感觉吃饭速度更快(10 分钟以内吃完, 经常被别人说吃的比较快)    |    |     |      |    |
| 12 | 吃汤面的时候经常一半以上的汤都喝掉(一天喝 2 碗以上的汤)            |    |     |      |    |
| 13 | 每周 3 天或以上, 出现 1 日不足三餐的情况。                 |    |     |      |    |
| 14 | 每周 5 次或以上, 吃饭的时候经常加酱油、面酱、豆瓣酱等酱料调味料        |    |     |      |    |
| 15 | 每周 5 次或以上, 经常使用黄油或者其他油脂类调味料               |    |     |      |    |
| 16 | 在吃饭的时候会确认和考虑食物的成分和内容以及吃的顺序                |    |     |      |    |
| 17 | 喜欢咸辣口味或者重口味的食品                            |    |     |      |    |
| 18 | 每天 1 次或以上, 会在餐后或者 2 顿饭中间吃水果               |    |     |      |    |
| 19 | 每周 3 次或以上, 会在晚饭后 3 小时内睡觉                  |    |     |      |    |
| 20 | 每次的喝酒量比较大(啤酒 1L, 红酒 350ml 以上)             |    |     |      |    |
| 21 | 饮酒比较频繁(每周 5 次或以上)                         |    |     |      |    |
| 22 | 每周 4 次或以上, 会在餐后或者 2 顿饭中间吃零食、点心、面包或者冰淇淋等甜食 |    |     |      |    |
| 23 | 1 年有 2 个月或以上, 宴会或聚会比较多的月份(每月 4 次或以上)      |    |     |      |    |
| 24 | 每周 4 次或以上, 经常喝罐装咖啡、果汁、营养饮料、运动饮料等甜的饮料      |    |     |      |    |
| 25 | 每周 4 次或以上, 经常喝带有果汁的蔬菜汁、乳酸菌(非原味酸奶)         |    |     |      |    |
| 26 | 现在有吸烟习惯(包含电子烟)                            |    |     |      |    |
| 27 | 工作以桌面工作(长期坐着)为主                           |    |     |      |    |
| 28 | 比起楼梯更多使用电梯或者扶梯                            |    |     |      |    |
| 29 | 每周 2 次或以上, 持续进行少量出汗的运动                    |    |     |      |    |
| 30 | 每天包括工作时间内, 没有进行 30 分钟以上的步行(身体没有移动)        |    |     |      |    |
| 31 | 经常感觉乏力                                    |    |     |      |    |
| 32 | 即使运动也不能持久                                 |    |     |      |    |
| 33 | 比起步行和自行车, 更多乘坐汽车或者公共交通工具                  |    |     |      |    |
| 34 | 运动时感觉到腰部或者关节疼痛                            |    |     |      |    |

JABHQ-C

|    |                              |  |  |  |  |
|----|------------------------------|--|--|--|--|
| 35 | 坐车时尽可能的想坐下                   |  |  |  |  |
| 36 | 身边没有一起运动的朋友                  |  |  |  |  |
| 37 | 不是特别喜欢运动                     |  |  |  |  |
| 38 | 周末比起运动更想休息                   |  |  |  |  |
| 39 | 运动时感觉不到快乐                    |  |  |  |  |
| 40 | 由于照顾老人或者孩子缺乏自己的时间            |  |  |  |  |
| 41 | 现在没有想运动的心情                   |  |  |  |  |
| 42 | 不知道如何进行运动                    |  |  |  |  |
| 43 | 加班比较多（工作量比较大）                |  |  |  |  |
| 44 | 经常感觉到时间紧迫                    |  |  |  |  |
| 45 | 是不到限期不干活儿的类型                 |  |  |  |  |
| 46 | 在工作单位或家庭里感到压力比较大             |  |  |  |  |
| 47 | 通过吃喝来减压的时候比较多                |  |  |  |  |
| 48 | 没有减压的方法或者时间                  |  |  |  |  |
| 49 | 生活环境有比较大的变化，经常感觉到不安或者苦恼      |  |  |  |  |
| 50 | 想法比较悲观，经常对任何事情都没有兴趣          |  |  |  |  |
| 51 | 突然感到烦躁，情感的起伏比较大              |  |  |  |  |
| 52 | 白天经常会比较困                     |  |  |  |  |
| 53 | 工作和生活经常提不起精神                 |  |  |  |  |
| 54 | 在地铁或公交上坐下后，经常感觉到迷迷糊糊         |  |  |  |  |
| 55 | 休息日经常【补觉】（和平时相比睡眠时间增加2个小时以上） |  |  |  |  |
| 56 | 容易感冒生病                       |  |  |  |  |
| 57 | 生活没有规律                       |  |  |  |  |
| 58 | 感到睡眠质量不好（不容易睡着或者不容易起床，睡得比较轻） |  |  |  |  |
| 59 | 感到偏头痛或者头部的不适增多。              |  |  |  |  |
| 60 | 肩膀疼或者眼疲劳变多。                  |  |  |  |  |
| 61 | 感到身体倦怠或者比较容易疲劳。              |  |  |  |  |
| 62 | 和20岁左右比，体重有10kg以上增长。         |  |  |  |  |
| 63 | 不太在意自己的体型（别人的看法）。            |  |  |  |  |
| 64 | 没想过有自身开始改善健康的问题。             |  |  |  |  |
| 65 | 不清楚适合自己的改善健康的方法。             |  |  |  |  |
| 66 | 周围的人经常指出自己的生活习惯或者体型的不足。      |  |  |  |  |
| 67 | 每年接受健康诊断。                    |  |  |  |  |
| 68 | 即使被指出健康诊断结果的不足也不是很在意。        |  |  |  |  |
| 69 | 经常吃健康食品或者保健品（或者想吃）。          |  |  |  |  |
| 70 | 现在有比自身健康更优先的事情。              |  |  |  |  |
